# Supplementary material for: Spatial Disparities of Ozone Pollution in the Sichuan Basin Spurred by an Extreme Heatwave
Source: Copernicus journal article supplement (doi:10.5194/egusphere-2023-2284), 2023-12-08
Supplement: Supplementary file 1 [file egusphere-2023-2284-supplement.pdf]

1 **Supplementary Materials for “Spatial Disparities of**  
2 **Ozone Pollution in the Sichuan Basin Spurred by An**  
3 **Extreme Heatwave”**

4  
5

6 Wang Nan<sup>1\*</sup>, Du Yunsong<sup>1</sup>, Chen Dongyang<sup>1</sup>, Meng Haiyan<sup>1</sup>, Chen Xi<sup>2</sup>,  
7 Zhou Li<sup>1</sup>, Shi Guangming<sup>1</sup>, Zhan Yu<sup>1</sup>, Feng Miao<sup>3</sup>, Li Wei<sup>3</sup>, Chen Mulan<sup>4</sup>,  
8 Li Zhenliang<sup>4</sup>, Lu Chengwei<sup>3</sup>, Yang Fumo<sup>1\*</sup>

9

10 <sup>1</sup>College of Carbon Neutrality Future Technology, Sichuan University, Sichuan, China

11 <sup>2</sup>Institute of Mass Spectrometry and Atmospheric Environment, Guangdong Provincial  
12 Engineering Research Center for On-line Source Apportionment System of Air  
13 Pollution, Jinan University, Guangzhou, PR China

14 <sup>3</sup>Chengdu Academy of Environmental Sciences, Chengdu, 610072, China

15 <sup>4</sup>Chongqing Research Academy of Eco-Environmental Sciences, Chongqing, 401147,  
16 China

17

18

19 Correspondence to [fmyang@scu.edu.cn](mailto:fmyang@scu.edu.cn), [nan.wang@scu.edu.cn](mailto:nan.wang@scu.edu.cn)

20

21

22 **Supporting Information**

23 Supporting Information includes 9 pages, 6 figures and 3 tables

24 SI Figures S1-S6, p3-p6

25 SI Tables S1-S3, p7-p9

26

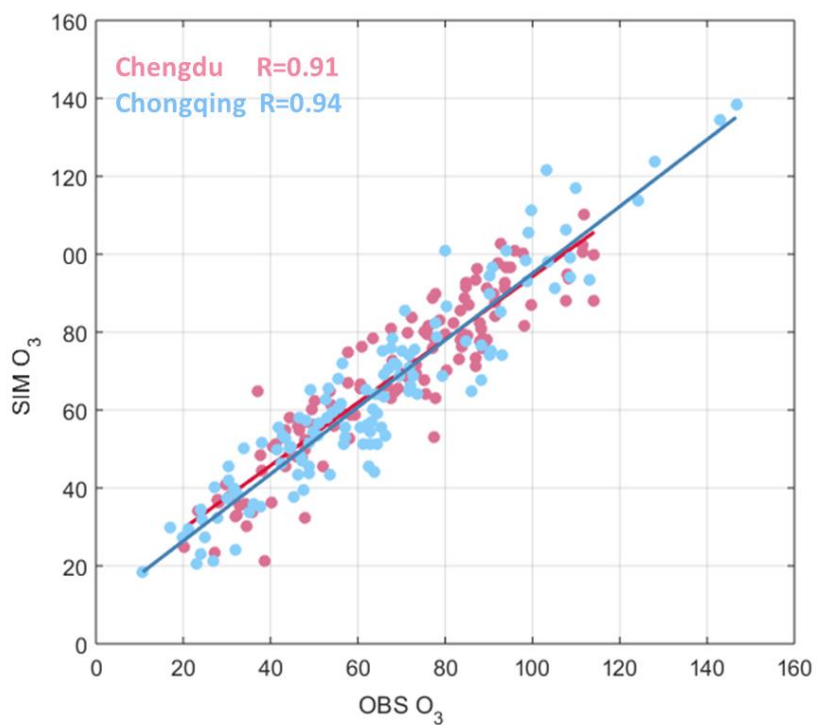

27  
28  
29  
30

Fig S1 Comparison of machine learning simulated O<sub>3</sub> with observations in Chengdu and Chongqing

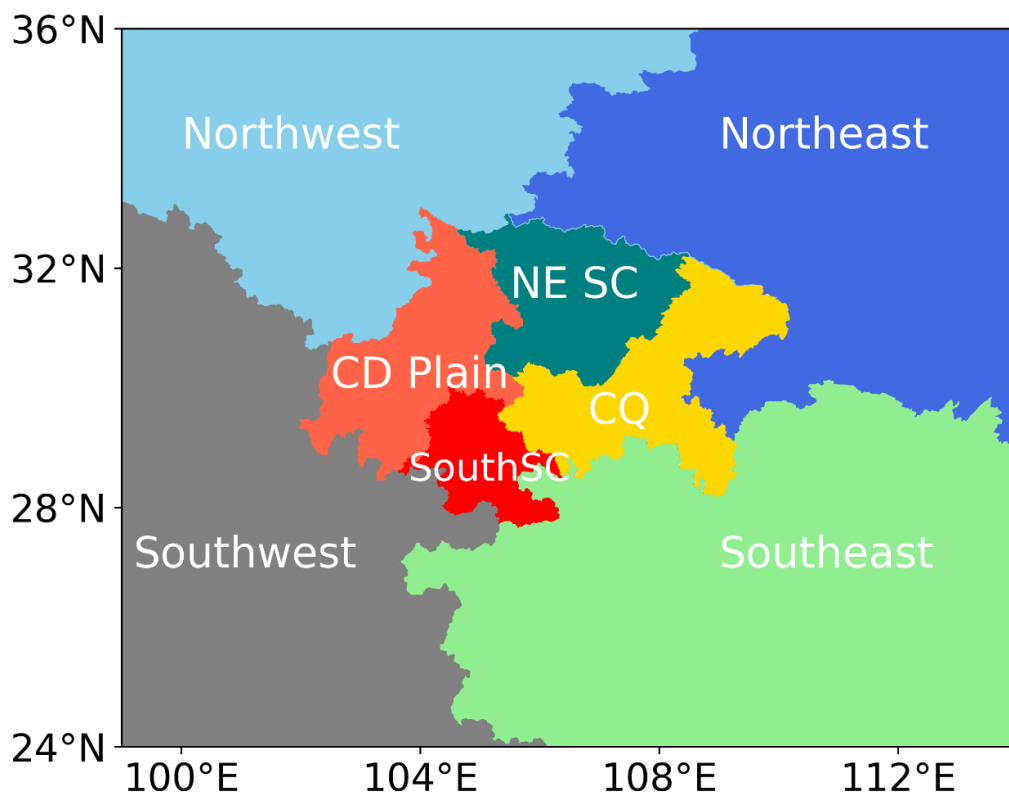

31  
32  
33

Fig S2 The map showing the tracked source regions in CMAQ-ISAM model.

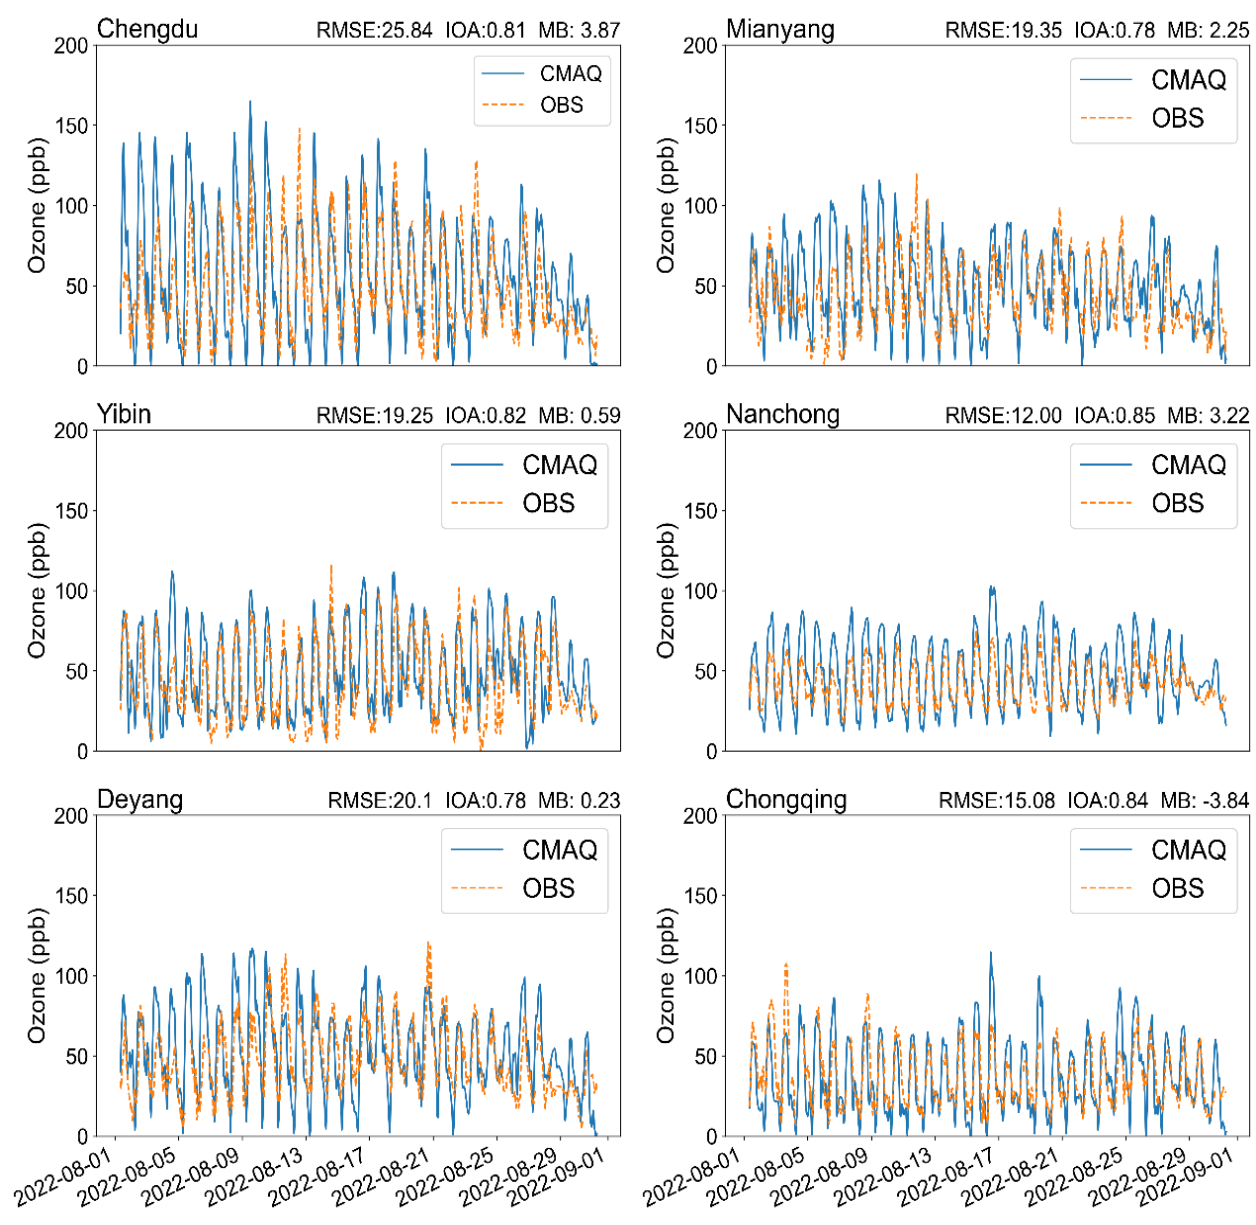

Fig S3 Comparison of the simulated and observed O<sub>3</sub> concentrations at different cities within the SCB regions.( RMSE stands for root mean square error; IOA stands for index of agreement and MB stands for mean bias)

34  
35  
36  
37  
38  
39  
40  
41  
42  
43  
44  
45  
46  
47  
48

49

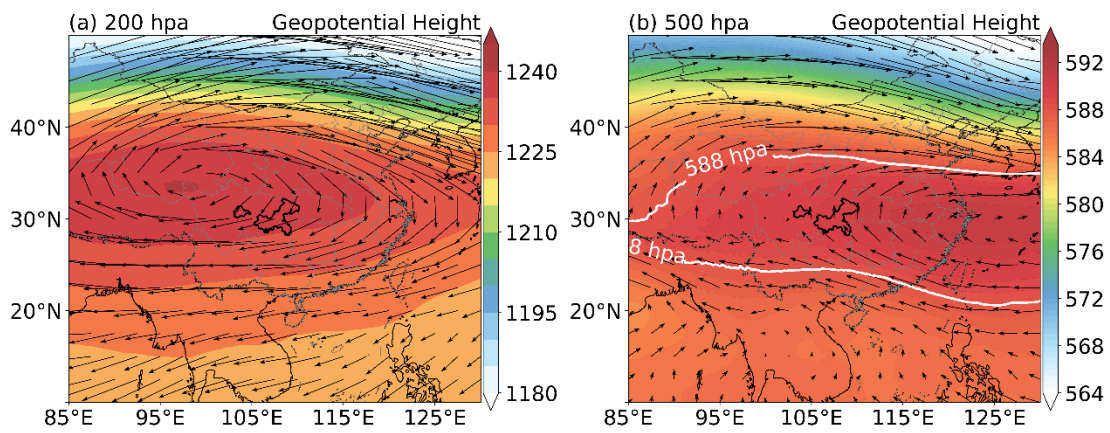

50

51

52 Fig S4 (a) Distributions of the South Asia High (200 hpa) and (b) the Western Pacific  
53 Subtropical High (500 hpa)  
54  
55

56

57

58

59

60

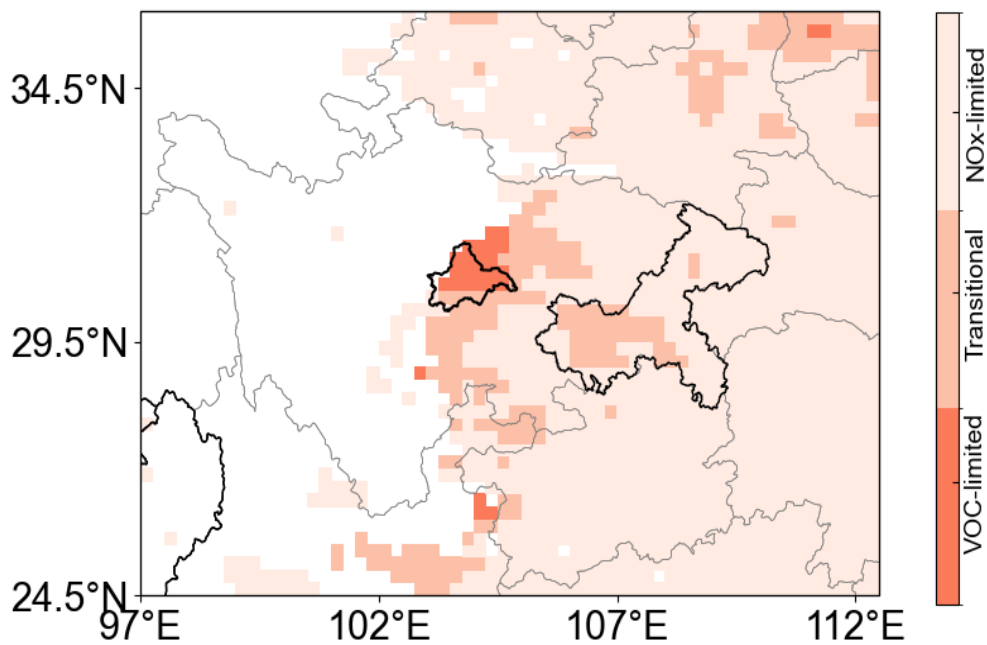

61

62 Fig S5 Spatial distribution of satellite diagnosed  $O_3$ - $NO_x$ -VOCs sensitivity in the  
63 SCB. (The regime was identified based on the ration of HCHO and  $NO_2$ )  
64

65

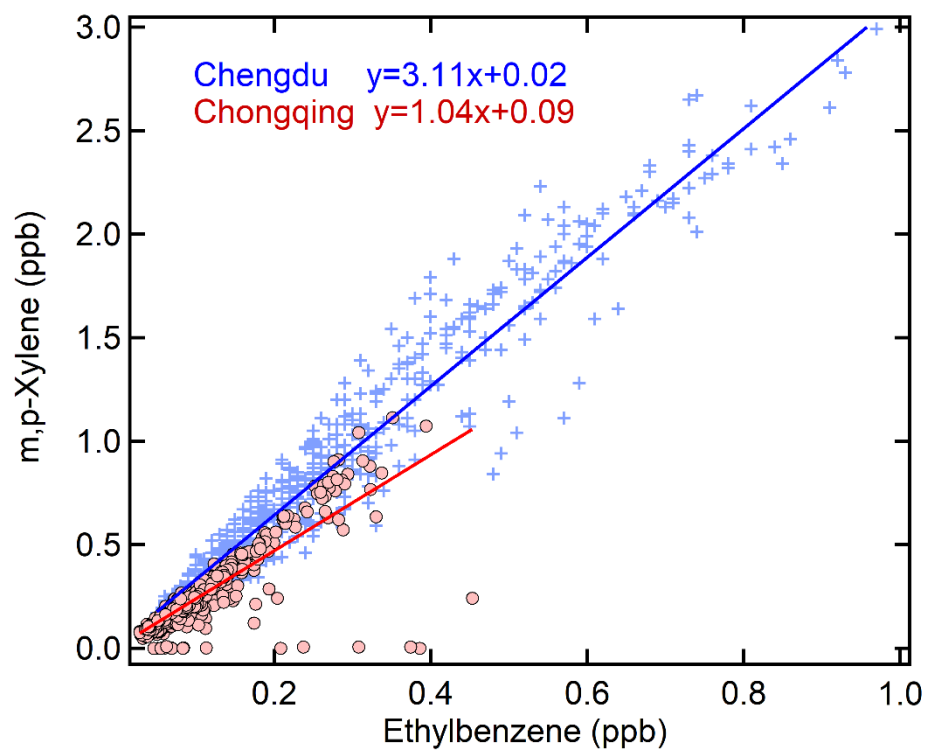

66

67 Fig S6 Scatter plot of m,p-Xylene and ethylbenzene in Chengdu and Chongqing

68

69

70

Table S1 Introduction of monitoring instruments used in this work

| Parameter   | Manufacture       | model                                         | resolution |
|-------------|-------------------|-----------------------------------------------|------------|
| O3          | Thermo Scientific | 49i-D1NAA                                     | 5min       |
| NOx         | Thermo Scientific | 42i-DNMSDAA                                   | 5min       |
| CO          | Thermo Scientific | 48i-DNSAA                                     | 5min       |
| SO2         | Thermo Scientific | 43i-DNSAA                                     | 5min       |
| VOC         | Synspec           | GC955-611/811                                 | 1h         |
| Meteorology | Lufft             | Chengdu: WS600-UMB<br>Chongqing: WS502-WTB100 |            |

71

72

73 Tables S2. Statistics of VOC mixing ratios measured in Chengdu and Chongqing. The  
 74 S.D. denotes the standard deviation of the mixing ratios of VOC species (Unit: ppbv).

75

| Class   | VOC species        | Chengdu |      | Chongqing |      |
|---------|--------------------|---------|------|-----------|------|
|         |                    | Mean    | S.D. | Mean      | S.D. |
| Alkanes | Ethane             | 4.1     | 0.6  | 1.6       | 0.2  |
|         | Propane            | 2.8     | 0.7  | 0.6       | 0.1  |
|         | 2-Methylpropane    | 1.0     | 0.2  | 0.3       | 0.1  |
|         | Butane             | 1.5     | 0.4  | 0.7       | 0.2  |
|         | 2-Methylbutane     | 1.3     | 0.3  | 1.0       | 0.1  |
|         | n-Pentane          | 0.3     | 0.1  | 0.3       | 0.1  |
|         | Cyclohexane        | -       | -    | 0.1       | 0.0  |
|         | 2,2-Dimethylbutane | 0.1     | 0.0  | 0.0       | 0.0  |
|         | 2,3-Dimethylbutane | 0.0     | 0.0  | 0.3       | 0.0  |
|         | 2-Methylpentane    | 0.6     | 0.1  | 0.2       | 0.0  |
|         | 3-Methylpentane    | 0.2     | 0.0  | 0.1       | 0.0  |
|         | n-Hexane           | 0.6     | 0.2  | 0.1       | 0.0  |
|         | 2-Methylhexane     | -       | -    | 0.0       | 0.0  |
|         | 3-Methylhexane     | 0.1     | 0.0  | 0.1       | 0.0  |
|         | Heptane            | 0.1     | 0.0  | 0.1       | 0.0  |
|         | Octane             | 0.2     | 0.0  | 0.0       | 0.0  |
|         | n-Nonane           | 0.0     | 0.0  | 0.1       | 0.0  |

|           |                        |     |     |     |     |
|-----------|------------------------|-----|-----|-----|-----|
|           | n-Decane               | -   | -   | 0.0 | 0.0 |
|           | Undecane               | 0.0 | 0.0 | 0.0 | 0.0 |
|           | n-Dodecane             | -   | -   | 0.0 | 0.0 |
| Alkenes   | Ethene                 | 0.9 | 0.3 | 0.4 | 0.1 |
|           | Propene                | 0.1 | 0.1 | 0.2 | 0.0 |
|           | 1,3-Butadiene          | -   | -   | 0.0 | 0.0 |
|           | 1-Butene               | 0.1 | 0.0 | 0.1 | 0.0 |
|           | Cis-2-BUTENE           | 0.1 | 0.0 | 0.1 | 0.0 |
|           | Trans-2-Butene         | 0.1 | 0.0 | 0.1 | 0.0 |
|           | Isoprene               | 0.3 | 0.3 | 0.6 | 0.5 |
|           | Cis-2-Pentene          | 0.0 | 0.0 | 0.0 | 0.0 |
|           | 1-Pentene              | 0.1 | 0.0 | 0.1 | 0.0 |
|           | Trans-2-Pentene        | 0.0 | 0.0 | 0.0 | 0.0 |
|           | 1-Hexene               | 0.1 | 0.0 | 0.0 | 0.0 |
| Alkyne    | Ethyne                 | -   | -   | 1.2 | 0.3 |
| Aromatics | Benzene                | 0.4 | 0.1 | 0.3 | 0.1 |
|           | Toluene                | 1.0 | 0.2 | 0.5 | 0.1 |
|           | Ethenylbenzene         | 0.1 | 0.0 | 0.0 | 0.0 |
|           | Ethylbenzene           | 0.3 | 0.1 | 0.1 | 0.1 |
|           | m-Xylene               | 1.0 | 0.3 | 0.4 | 0.2 |
|           | o-Xylene               | 0.4 | 0.1 | 0.2 | 0.1 |
|           | Isopropylbenzene       | 0.0 | 0.0 | 0.0 | 0.0 |
|           | Propylbenzene          | 0.0 | 0.0 | 0.0 | 0.0 |
|           | 3-Ethyltoluene         | 0.0 | 0.0 | 0.0 | 0.0 |
|           | 4-Ethyltoluene         | 0.0 | 0.0 | 0.0 | 0.0 |
|           | 1,3,5-Trimethylbenzene | 0.0 | 0.0 | 0.0 | 0.0 |
|           | 2-Ethyltoluene         | 0.0 | 0.0 | 0.0 | 0.0 |
|           | 1,2,4-Trimethylbenzene | 0.1 | 0.0 | 0.1 | 0.0 |
|           | 1,2,3-Trimethylbenzene | 0.0 | 0.0 | 0.0 | 0.0 |



76

77

78

Table S3 Configuration and settings of WRF-CMAQ modeling system

| Item                        | Scheme                                                                      |
|-----------------------------|-----------------------------------------------------------------------------|
| Grid resolution             | outer: 36k×36km; inner: 12×12 km                                            |
| Initial/boundary conditions | WRF: ECMWF reanalysis data<br>CMAQ-outer: profile<br>CMAQ-inner: CMAQ-outer |
| Microphysics                | WRF single-moment 5-class microphysics                                      |
| Short-wave radiation        | Goddard                                                                     |
| Long-Wave radiation         | RRTM                                                                        |
| WRF nudging                 | Yes                                                                         |
| Boundary Layer              | ACM2                                                                        |
| Gas-phase Chemistry         | CB6                                                                         |
| Aerosol option              | AERO6                                                                       |
| Dry deposition              | M3DRY                                                                       |
| Anthropogenic emissions     | MEIC+MIX                                                                    |
| Natural emissions           | MEGAN(version 2.10)                                                         |

79

80

81
